# Supplementary material for: Effects of Animal Diet and Processing Methods on the Quality Traits of Dry-Cured Ham Produced from Turopolje Pigs
Source: MDPI journal article supplement (doi:10.3390/ani14020286), 2024-01-17
Supplement: s1 [file s1]

# **Effect of animal's diet and processing method on quality traits of dry-cured ham produced from Turopolje pigs**

**Danijel Karolyi, Martin Škrlep, Nives Marušić Radovčić, Zoran Luković, Dubravko Škorput, Krešimir Salajpal, Kristina Kljak and Marjeta Čandek Potokar**

Supplementary Data, Tables S1, S2 and S3.

**Table S1.** Effect of animal's diet and processing method on volatile compounds of biceps femoris muscle of TP dry-cured ham.

| Volatile Compounds                        | Processing (P) |          | Diet (D) |         | RMSE  | Significance |    |             |
|-------------------------------------------|----------------|----------|----------|---------|-------|--------------|----|-------------|
|                                           | Less smoke     | Standard | Acorn    | Control |       | P            | D  | Interaction |
| Aldehydes                                 |                |          |          |         |       |              |    |             |
| 3-Methylbutanal                           | 0.25           | 0.40     | 0.44     | 0.22    | 0.187 | ns           | ns | ns          |
| 2-Methylbutanal                           | 0.39           | 0.39     | 0.50     | 0.28    | 0.121 | ns           | t  | ns          |
| Pentanal                                  | 0.63           | 0.54     | 0.58     | 0.59    | 0.243 | ns           | ns | ns          |
| Hexanal                                   | 9.25           | 6.33     | 7.29     | 8.30    | 4.06  | ns           | ns | ns          |
| Heptanal                                  | 2.42           | 2.57     | 2.26     | 2.74    | 1.40  | ns           | ns | ns          |
| Benzaldehyde                              | 1.91           | 2.14     | 2.04     | 2.01    | 1.33  | ns           | ns | ns          |
| Octanal                                   | 4.68           | 4.42     | 5.24     | 3.86    | 1.76  | ns           | ns | ns          |
| Benzeneacetaldehyde                       | 0.86           | 1.48     | 1.72     | 0.62    | 1.29  | ns           | ns | ns          |
| Nonanal                                   | 6.87           | 13.13    | 13.70    | 6.29    | 4.11  | t            | t  | ns          |
| 2-Nonenal                                 | 0.20           | 0.36     | 0.48     | 0.08    | 0.321 | ns           | ns | ns          |
| 4-Ethyl-benzaldehyde                      | 0.06           | 0.11     | 0.10     | 0.07    | 0.061 | ns           | ns | ns          |
| Decanal                                   | 0.51           | 0.81     | 0.85     | 0.47    | 0.239 | ns           | t  | ns          |
| 2,4-Nonadienal                            | 0.32           | 0.31     | 0.23     | 0.40    | 0.326 | ns           | ns | ns          |
| 2-Decenal                                 | 0.27           | 1.30     | 0.60     | 0.97    | 0.832 | ns           | ns | ns          |
| Tetradecanal                              | 0.15           | 0.40     | 0.18     | 0.38    | 0.098 | *            | *  | ns          |
| Hexadecanal                               | 0.19           | 0.48     | 0.31     | 0.37    | 0.039 | *            | t  | ns          |
| Σ Total                                   | 29.00          | 35.40    | 36.61    | 27.79   | 7.00  | ns           | ns | ns          |
| Alcohols                                  |                |          |          |         |       |              |    |             |
| 1-Pentanol                                | 1.09           | 1.06     | 0.72     | 1.44    | 1.24  | ns           | ns | ns          |
| 3-Methyl-1-butanol                        | 0.09           | 0.00     | 0.00     | 0.09    | 0.125 | ns           | ns | ns          |
| 1-Hexanol                                 | 0.32           | 0.53     | 0.43     | 0.42    | 0.351 | ns           | ns | ns          |
| 2-Methyl-4-octanol                        | 0.49           | 0.00     | 0.03     | 0.45    | 0.641 | ns           | ns | ns          |
| 1-Heptanol                                | 0.78           | 0.85     | 0.75     | 0.89    | 0.427 | ns           | ns | ns          |
| 1-Octen-3-ol                              | 2.83           | 2.54     | 2.63     | 2.73    | 0.990 | ns           | ns | ns          |
| 2-Ethyl-1-hexanol                         | 4.30           | 1.90     | 4.49     | 1.70    | 2.85  | ns           | ns | ns          |
| Benzylalcohol                             | 2.00           | 0.26     | 1.36     | 0.90    | 1.73  | ns           | ns | ns          |
| 2-(1-methylethyl)-cyclohexanol            | 1.27           | 0.00     | 0.27     | 0.99    | 1.13  | ns           | ns | ns          |
| Phenylethyl alcohol                       | 2.49           | 1.79     | 1.93     | 2.35    | 2.35  | ns           | ns | ns          |
| 2,6-Dimethyl-4-heptanol                   | 0.00           | 0.67     | 0.15     | 0.52    | 0.504 | ns           | ns | ns          |
| 2-Phenoxy-ethanol                         | 0.49           | 0.00     | 0.29     | 0.21    | 0.466 | ns           | ns | ns          |
| 2-Ethyl-hexanol                           | 4.30           | 1.89     | 4.49     | 1.70    | 2.85  | ns           | ns | ns          |
| 4-Methyl-1-(1-methylethyl)-3-cyclohexenol | 0.51           | 0.00     | 0.18     | 0.32    | 0.183 | *            | ns | ns          |
| Σ Total                                   | 17.06          | 9.66     | 13.41    | 13.31   | 5.74  | ns           | ns | ns          |
| Aromatic hydrocarbons                     |                |          |          |         |       |              |    |             |
| Benzene                                   | 0.31           | 0.00     | 0.20     | 0.11    | 0.215 | ns           | ns | ns          |
| 1,2-Dimethoxy-benzene                     | 0.68           | 1.23     | 1.24     | 0.68    | 0.584 | ns           | ns | ns          |
| Pentyl-benzene                            | 0.46           | 0.31     | 0.27     | 0.51    | 0.178 | ns           | ns | ns          |
| 3,4-Dimetoxytoluene                       | 0.67           | 1.28     | 1.32     | 0.63    | 0.782 | ns           | ns | ns          |
| 3,5-Dimetoxytoluene                       | 0.00           | 0.11     | 0.03     | 0.09    | 0.128 | ns           | ns | ns          |
| 1,2,3-Trimethoxybenzene                   | 0.28           | 0.87     | 0.61     | 0.54    | 0.315 | t            | ns | ns          |
| 1,2,4-Trimethoxybenzene                   | 0.15           | 1.20     | 0.17     | 0.29    | 0.184 | ns           | ns | ns          |

Table S1. Continuation.

| Volatile<br>Compounds                      | Processing (P) |          | Diet (D) |         | RMSE  | Significance |    |             |
|--------------------------------------------|----------------|----------|----------|---------|-------|--------------|----|-------------|
|                                            | Less<br>smoke  | Standard | Acorn    | Control |       | P            | D  | Interaction |
| 4-Ethyl-1,2-dimethoxybenzene               | 0.13           | 0.93     | 0.24     | 0.80    | 0.828 | ns           | ns | ns          |
| 1,2,3-Trimethoxy-5-methylbenzene           | 0.15           | 1.20     | 0.20     | 1.15    | 1.44  | ns           | ns | ns          |
| $\Sigma$ Total                             | 2.81           | 6.26     | 2.29     | 4.78    | 3.53  | ns           | ns | ns          |
| <b>Ketones</b>                             |                |          |          |         |       |              |    |             |
| 2-Pentanone                                | 0.07           | 0.00     | 0.07     | 0.00    | 0.097 | ns           | ns | ns          |
| 2-Heptanone                                | 0.65           | 0.63     | 0.78     | 0.50    | 0.650 | ns           | ns | ns          |
| 1-Octen-3-one                              | 0.90           | 0.13     | 0.41     | 0.61    | 0.450 | t            | ns | ns          |
| 3-Octen-2-one                              | 0.00           | 0.07     | 0.00     | 0.07    | 0.105 | ns           | ns | ns          |
| 2-Nonanone                                 | 1.08           | 0.65     | 0.43     | 1.30    | 1.29  | ns           | ns | ns          |
| 1-Phenyl-2-propanone                       | 0.34           | 0.21     | 0.34     | 0.20    | 0.239 | ns           | ns | ns          |
| 2-Decanone                                 | 0.84           | 0.00     | 0.14     | 0.70    | 0.185 | *            | *  | *           |
| 2,3-Dihydro-1H-inden-1-one                 | 0.44           | 0.43     | 0.32     | 0.55    | 0.239 | ns           | ns | ns          |
| 3-Undecanone                               | 0.00           | 0.05     | 0.00     | 0.05    | 0.065 | ns           | ns | ns          |
| 3-Octadecanone                             | 0.15           | 0.13     | 0.08     | 0.20    | 0.140 | ns           | ns | ns          |
| Dihydro-5-pentyl-2-furanone                | 0.13           | 0.49     | 0.28     | 0.35    | 0.368 | ns           | ns | ns          |
| 6,10-Dimethyl-5,9-undecadien-2-one         | 0.16           | 0.31     | 0.28     | 0.18    | 0.024 | *            | *  | *           |
| 2-Hydroxy-3,4-dimethyl-2-cyclopenten-1-one | 0.18           | 0.00     | 0.14     | 0.04    | 0.206 | ns           | ns | ns          |
| $\Sigma$ Total                             | 4.92           | 3.10     | 3.27     | 4.75    | 1.90  | ns           | ns | ns          |
| <b>Phenols</b>                             |                |          |          |         |       |              |    |             |
| 2-Methylphenol                             | 0.75           | 1.83     | 1.02     | 1.01    | 0.538 | ns           | ns | ns          |
| 3-Methylphenol                             | 0.61           | 0.41     | 0.35     | 0.66    | 0.059 | *            | *  | *           |
| 4-Methylphenol                             | 1.59           | 0.51     | 1.44     | 0.66    | 1.68  | ns           | ns | ns          |
| 2-Methoxyphenol                            | 3.85           | 6.44     | 5.88     | 4.41    | 2.35  | ns           | ns | ns          |
| 2,4-Dimethylphenol                         | 0.00           | 0.39     | 0.30     | 0.09    | 0.300 | ns           | ns | ns          |
| 2-Methoxy-3-methylphenol                   | 0.20           | 0.31     | 0.24     | 0.27    | 0.253 | ns           | ns | ns          |
| 3-Ethylphenol                              | 0.23           | 0.42     | 0.39     | 0.26    | 0.090 | *            | ns | ns          |
| 2,3-Dimethylphenol                         | 0.67           | 0.00     | 0.34     | 0.33    | 0.126 | *            | ns | ns          |
| 3,4-Dimethylphenol                         | 0.04           | 0.12     | 0.09     | 0.07    | 0.132 | ns           | ns | ns          |
| 2-Methoxy-4-methylphenol                   | 1.11           | 3.28     | 2.77     | 1.62    | 0.821 | *            | ns | ns          |
| 2,6-Dimethoxyphenol                        | 0.14           | 0.05     | 0.05     | 0.14    | 0.218 | ns           | ns | ns          |
| 4-Ethyl-2-methoxyphenol                    | 0.05           | 1.24     | 0.66     | 0.62    | 0.120 | *            | ns | ns          |
| 2,6-Dimethoxyphenol                        | 0.14           | 0.05     | 0.05     | 0.14    | 0.218 | ns           | ns | ns          |
| Eugenol                                    | 0.10           | 0.87     | 0.19     | 0.78    | 0.734 | ns           | ns | ns          |
| $\Sigma$ Total                             | 9.61           | 16.17    | 14.32    | 11.45   | 2.77  | *            | ns | ns          |
| <b>Alkanes and alkenes</b>                 |                |          |          |         |       |              |    |             |
| 1,2-Dimethyl-cyclopentane                  | 0.06           | 0.00     | 0.00     | 0.06    | 0.080 | ns           | ns | ns          |
| 3,4,5-Trimethyl-heptane                    | 2.30           | 1.52     | 1.44     | 2.37    | 0.711 | ns           | ns | ns          |
| 3-Methyl-heneicosane                       | 0.22           | 0.03     | 0.13     | 0.12    | 0.099 | *            | ns | ns          |
| Cyclooctane                                | 2.43           | 2.21     | 2.41     | 2.23    | 2.04  | ns           | ns | ns          |
| 4-Methyl-1-3-cyclohexene                   | 0.00           | 0.19     | 0.00     | 0.19    | 0.010 | *            | *  | *           |
| Cyclohexane                                | 0.00           | 0.06     | 0.00     | 0.06    | 0.081 | ns           | ns | ns          |

Table S1. Continuation.

| Volatile Compounds        | Processing (P) |          | Diet (D) |         | RMSE  | Significance |    |             |
|---------------------------|----------------|----------|----------|---------|-------|--------------|----|-------------|
|                           | Less smoke     | Standard | Acorn    | Control |       | P            | D  | Interaction |
| Tridecane                 | 0.21           | 0.13     | 0.21     | 0.13    | 0.117 | ns           | ns | ns          |
| Tetradecane               | 0.13           | 0.16     | 0.10     | 0.19    | 0.155 | ns           | ns | ns          |
| Cyclododecane             | 0.21           | 0.49     | 0.29     | 0.41    | 0.108 | *            | ns | ns          |
| 1-Pentadecene             | 0.00           | 0.19     | 0.13     | 0.06    | 0.104 | t            | ns | ns          |
| Pentadecane               | 0.14           | 0.22     | 0.18     | 0.18    | 0.044 | t            | ns | ns          |
| Hexadecane                | 0.06           | 0.08     | 0.07     | 0.06    | 0.038 | ns           | ns | ns          |
| $\Sigma$ Total            | 5.73           | 5.27     | 4.96     | 6.05    | 2.18  | ns           | ns | ns          |
| <b>Nitrogen compounds</b> |                |          |          |         |       |              |    |             |
| 2,6-Dimethylpyrazine      | 1.40           | 0.18     | 0.61     | 1.00    | 0.701 | t            | ns | ns          |
| Methoxy-phenil-oxime      | 1.66           | 10.20    | 6.27     | 5.60    | 6.78  | ns           | ns | ns          |
| 2,3,5-Trimethylpyrazine   | 1.55           | 0.52     | 1.31     | 0.76    | 1.15  | ns           | ns | ns          |
| $\Sigma$ Total            | 4.60           | 10.91    | 8.19     | 7.33    | 6.57  | ns           | ns | ns          |
| <b>Terpenes</b>           |                |          |          |         |       |              |    |             |
| Alpha-phellandrene        | 0.66           | 0.14     | 0.23     | 0.57    | 0.351 | ns           | ns | ns          |
| Alpha-terpinene           | 0.00           | 0.17     | 0.00     | 0.17    | 0.244 | ns           | ns | ns          |
| 4-Carene                  | 0.81           | 0.00     | 0.05     | 0.76    | 1.08  | ns           | ns | ns          |
| Limonene                  | 0.55           | 0.42     | 0.29     | 0.67    | 0.437 | ns           | ns | ns          |
| Cis-beta terpineol        | 1.17           | 0.50     | 0.81     | 0.85    | 0.635 | ns           | ns | ns          |
| Linalool                  | 3.40           | 0.14     | 1.97     | 1.57    | 2.78  | ns           | ns | ns          |
| Sabinene                  | 0.00           | 3.37     | 0.13     | 0.24    | 0.303 | ns           | ns | ns          |
| Caryophyllene             | 0.08           | 0.10     | 0.02     | 0.16    | 0.170 | ns           | ns | ns          |
| $\Sigma$ Total            | 6.66           | 1.46     | 3.50     | 5.00    | 2.92  | t            | ns | ns          |
| <b>Acids</b>              |                |          |          |         |       |              |    |             |
| Nonanoic acid             | 0.00           | 0.07     | 0.00     | 0.07    | 0.100 | ns           | ns | ns          |
| Hexadecanoic acid         | 0.40           | 0.00     | 0.28     | 0.12    | 0.029 | *            | *  | *           |
| $\Sigma$ Total            | 0.40           | 0.07     | 0.28     | 0.19    | 0.100 | *            | ns | *           |

\*p $\leq$ 0.05; t - p<0.10; ns - p>0.05; RMSE – root mean square error**Table S2:** Effect of animal's diet and ham processing effect (DxP) interaction on volatile compounds of TP dry-cured hams

| Trait                              | Acorn             |                   | Control            |                   | RMSE  |
|------------------------------------|-------------------|-------------------|--------------------|-------------------|-------|
|                                    | Less smoke        | Standard          | Less smoke         | Standard          |       |
| 2-Decanone                         | 0.28 <sup>b</sup> | 0.00 <sup>b</sup> | 1.39 <sup>a</sup>  | 0.00 <sup>b</sup> | 0.185 |
| 6,10-Dimethyl-5,9-undecadien-2-one | 0.15 <sup>b</sup> | 0.42 <sup>a</sup> | 0.18 <sup>b</sup>  | 0.19 <sup>b</sup> | 0.024 |
| 3-Methylphenol                     | 0.31 <sup>b</sup> | 0.39 <sup>b</sup> | 0.90 <sup>a</sup>  | 0.42 <sup>b</sup> | 0.059 |
| 4-Methyl-1-3-cyclohexen            | 0.00 <sup>b</sup> | 0.00 <sup>b</sup> | 0.00 <sup>b</sup>  | 0.38 <sup>a</sup> | 0.009 |
| Hexadecanoic acid                  | 0.55 <sup>a</sup> | 0.00 <sup>c</sup> | 0.25 <sup>b</sup>  | 0.00 <sup>c</sup> | 0.028 |
| Total Acids                        | 0.55 <sup>a</sup> | 0.00 <sup>b</sup> | 0.25 <sup>ab</sup> | 0.14 <sup>b</sup> | 0.100 |

abc - mean values of least squares without common superscript letters significantly differ (p $\leq$ 0.05); RMSE – root mean square error

**Table S3.** Hedges' g effect sizes for volatile compounds of biceps femoris muscle of TP dry-cured ham.

| <b>Volatile<br/>Compounds</b>             | <b>Processing (P)</b> | <b>Diet (D)</b> |
|-------------------------------------------|-----------------------|-----------------|
| <b>Aldehydes</b>                          |                       |                 |
| 3-Methylbutanal                           | 0.64                  | <b>-1.06</b>    |
| 2-Methylbutanal                           | 0.00                  | <b>-1.03</b>    |
| Pentanal                                  | -0.31                 | 0.08            |
| Hexanal                                   | -0.68                 | 0.23            |
| Heptanal                                  | 0.11                  | 0.36            |
| Benzaldehyde                              | 0.19                  | -0.04           |
| Octanal                                   | -0.14                 | -0.64           |
| Benzeneacetaldehyde                       | 0.44                  | <b>-1.15</b>    |
| Nonanal                                   | <b>0.99</b>           | <b>-1.07</b>    |
| 2-Nonenal                                 | 0.40                  | <b>-1.11</b>    |
| 4-Ethyl-benzaldehyde                      | <b>0.93</b>           | -0.07           |
| Decanal                                   | <b>0.81</b>           | -0.54           |
| 2,4-Nonadienal                            | -0.01                 | 0.59            |
| 2-Decenal                                 | <b>1.15</b>           | 0.29            |
| Tetradecanal                              | <b>1.38</b>           | 0.31            |
| Hexadecanal                               | <b>5.11</b>           | 0.03            |
| <i>Σ Total</i>                            | 0.72                  | -0.54           |
| <b>Alcohols</b>                           |                       |                 |
| 1-Pentanol                                | -0.02                 | 0.60            |
| 3-Methyl-1-butanol                        | -0.62                 | 0.31            |
| 1-Hexanol                                 | 0.61                  | -0.03           |
| 2-Methyl-4-octanol                        | -0.68                 | 0.54            |
| 1-Heptanol                                | 0.15                  | 0.25            |
| 1-Octen-3-ol                              | -0.22                 | 0.07            |
| 2-Ethyl-1-hexanol                         | -0.67                 | <b>-1.71</b>    |
| Benzylalcohol                             | <b>-1.01</b>          | -0.72           |
| 2-(1-methylethyl)-cyclohexanol            | <b>-1.01</b>          | 0.50            |
| Phenylethyl alcohol                       | -0.28                 | 0.17            |
| 2,6-Dimethyl-4-heptanol                   | <b>1.15</b>           | 0.43            |
| 2-Phenoxy-ethanol                         | <b>-1.11</b>          | -0.17           |
| 2-Ethyl-hexanol                           | <b>-1.74</b>          | 0.19            |
| 4-Methyl-1-(1-methylethyl)-3-cyclohexenol | <b>-2.34</b>          | 0.15            |
| <i>Σ Total</i>                            | <b>-1.33</b>          | -0.02           |
| <b>Aromatic hydrocarbons</b>              |                       |                 |
| Benzene                                   | <b>-1.39</b>          | -0.18           |
| 1,2-Dimethoxy-benzene                     | <b>0.83</b>           | -0.62           |
| Pentyl-benzene                            | -0.60                 | <b>0.94</b>     |
| 3,4-Dimetoxytoluene                       | 0.66                  | -0.70           |
| 3,5-Dimetoxytoluene                       | <b>0.88</b>           | 0.14            |
| 1,2,3-Trimethoxybenzene                   | <b>1.70</b>           | -0.07           |
| 1,2,4-Trimethoxybenzene                   | 0.79                  | 0.25            |

Table S3. Continuation.

| <b>Volatile<br/>Compounds</b>              | <b>Processing (P)</b> | <b>Diet (D)</b> |
|--------------------------------------------|-----------------------|-----------------|
| 4-Ethyl-1,2-dimethoxybenzene               | <b>0.87</b>           | 0.51            |
| 1,2,3-Trimethoxy-5-methylbenzene           | 0.65                  | 0.56            |
| <i>Σ Total</i>                             | <b>1.02</b>           | 0.12            |
| <b>Ketones</b>                             |                       |                 |
| 2-Pentanone                                | -0.61                 | -0.31           |
| 2-Heptanone                                | -0.03                 | -0.61           |
| 1-Octen-3-one                              | <b>-1.69</b>          | 0.27            |
| 3-Octen-2-one                              | 0.61                  | 0.27            |
| 2-Nonanone                                 | -0.30                 | 0.66            |
| 1-Phenyl-2-propanone                       | -0.43                 | -0.50           |
| 2-Decanone                                 | <b>-1.52</b>          | 0.63            |
| 2,3-Dihydro-1H-inden-1-one                 | -0.01                 | 0.69            |
| 3-Undecanone                               | 0.61                  | 0.17            |
| 3-Octadecanone                             | -0.11                 | <b>0.97</b>     |
| Dihydro-5-pentyl-2-furanone                | <b>1.00</b>           | 0.10            |
| 6,10-Dimethyl-5,9-undecadien-2-one         | <b>1.33</b>           | -0.15           |
| 2-Hydroxy-3,4-dimethyl-2-cyclopenten-1-one | <b>-0.84</b>          | -0.34           |
| <i>Σ Total</i>                             | <b>-0.82</b>          | 0.59            |
| <b>Phenols</b>                             |                       |                 |
| 2-Methylphenol                             | <b>1.03</b>           | -0.01           |
| 3-Methylphenol                             | -0.71                 | <b>1.14</b>     |
| 4-Methylphenol                             | -0.65                 | <b>-0.88</b>    |
| 2-Methoxyphenol                            | <b>1.07</b>           | -0.44           |
| 2,4-Dimethylphenol                         | <b>1.15</b>           | -0.35           |
| 2-Methoxy-3-methylphenol                   | 0.47                  | 0.10            |
| 3-Ethylphenol                              | <b>1.41</b>           | -0.18           |
| 2,3-Dimethylphenol                         | <b>-5.62</b>          | -0.004          |
| 3,4-Dimethylphenol                         | 0.58                  | -0.09           |
| 2-Methoxy-4-methylphenol                   | <b>1.91</b>           | -0.54           |
| 2,6-Dimethoxyphenol                        | -0.36                 | 0.34            |
| 4-Ethyl-2-methoxyphenol                    | <b>8.02</b>           | -0.01           |
| 2,6-Dimethoxyphenol                        | <b>5.25</b>           | -0.03           |
| Eugenol                                    | <b>0.91</b>           | 0.61            |
| <i>Σ Total</i>                             | <b>2.00</b>           | -0.38           |
| <b>Alkanes and alkenes</b>                 |                       |                 |
| 1,2-Dimethyl-cyclopentane                  | -0.61                 | 0.21            |
| 3,4,5-Trimethyl-heptane                    | <b>-0.80</b>          | <b>1.38</b>     |
| 3-Methyl-heneicosane                       | <b>-1.91</b>          | -0.01           |
| Cyclooctane                                | -0.11                 | -0.19           |
| 4-Methyl-1-3-cyclohexene                   | <b>1.06</b>           | 0.41            |
| Cyclohexane                                | 0.61                  | 0.21            |

Table S3. Continuation.

| Volatile Compounds        | Processing (P) | Diet (D)    |
|---------------------------|----------------|-------------|
| Tridecane                 | -0.68          | -0.41       |
| Tetradecane               | 0.19           | 0.53        |
| Cyclododecane             | <b>1.94</b>    | 0.13        |
| 1-Pentadecene             | <b>1.65</b>    | -0.09       |
| Pentadecane               | <b>1.86</b>    | -0.005      |
| Hexadecane                | 0.42           | -0.06       |
| $\Sigma$ Total            | -0.21          | 0.54        |
| <b>Nitrogen compounds</b> |                |             |
| 2,6-Dimethylpyrazine      | <b>-1.15</b>   | 0.40        |
| Methoxy-phenil-oxime      | 1.34           | -0.09       |
| 2,3,5-Trimethylpyrazine   | <b>-0.89</b>   | -0.61       |
| $\Sigma$ Total            | <b>1.01</b>    | -0.11       |
| <b>Terpenes</b>           |                |             |
| Alpha-phellandrene        | <b>-0.90</b>   | 0.53        |
| Alpha-terpinene           | 0.62           | 0.46        |
| 4-Carene                  | -0.66          | 0.56        |
| Limonene                  | -0.25          | <b>0.94</b> |
| Cis-beta terpineol        | <b>-1.14</b>   | 0.07        |
| Linalool                  | <b>-1.24</b>   | -0.18       |
| Sabinene                  | <b>1.22</b>    | 0.16        |
| Caryophyllene             | 0.10           | <b>0.82</b> |
| $\Sigma$ Total            | <b>-1.60</b>   | 0.45        |
| <b>Acids</b>              |                |             |
| Nonanoic acid             | 0.61           | 0.25        |
| Hexadecanoic acid         | <b>-2.75</b>   | -0.15       |
| $\Sigma$ Total            | <b>-1.82</b>   | -0.13       |

Large effect sizes (Hedge's  $g > 0.8$ ) are indicated in bold
